# Supplementary material
Source: PubMed Central journal article supplement (PMC548991)

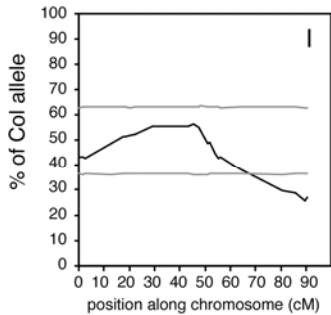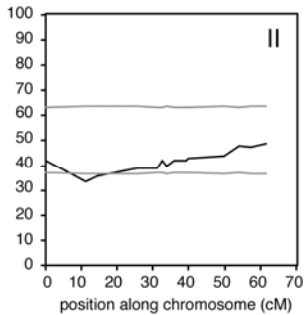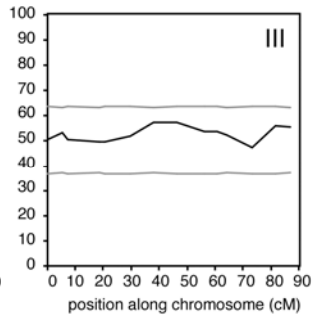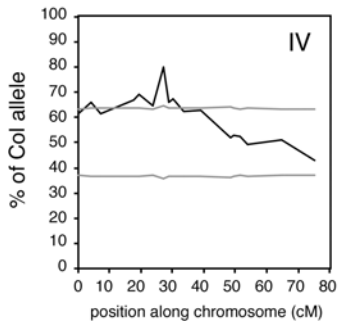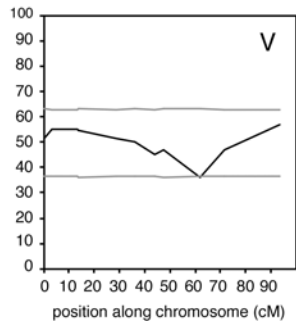

Supplement: pnas_102_7_2460__1.pdf [file pnas_102_7_2460__1.pdf]
